# Supplementary material
Source: MDPI journal article supplement (https://www.mdpi.com/2071-1050/12/1/117)
Supplement: s1 [file s1]

**Supplementary Materials:**

**Table S1.** Examples of verbatim responses coding to questions of tree benefits and problems.

| Item category         | Verbatim responses                                                                                             | Code                         |
|-----------------------|----------------------------------------------------------------------------------------------------------------|------------------------------|
| Ecosystem Services    | "shade", "shade for cars"                                                                                      | shade                        |
|                       | "freshness", "they hold the heat"                                                                              | lower temperature            |
|                       | "provide oxygen" "without trees we cannot breathe", "lung"                                                     | oxygen production            |
|                       | "they purify the air", "they reduce pollution"                                                                 | air purification             |
|                       | "beauty", "decoration", "visual decoration, green environment, more tropical"                                  | aesthetic value / ornamental |
|                       | "fruits", "edibles", "nourishment"                                                                             | food provision               |
|                       | "animals", "attract birds"                                                                                     | flora & fauna habitat        |
| Ecosystem Disservices | "falling leaves", "they shed branches, leaves and seeds", "they fill the roof with leaves and cog up the roof" | maintenance hardship         |
|                       | "the roots break the sidewalk", "they crack the walls"                                                         | reduced structural integrity |
|                       | "they are too high and they collide with power lines", if they grow too much is not good, power cutoffs"       | power lines obstruction      |
|                       | "they attract termites"                                                                                        | induces pests                |
|                       |                                                                                                                |                              |

**Table S2.** Survey questions included in our study.

| Question                                                                                                                                 | Measure | Range of answers                                                                                           |
|------------------------------------------------------------------------------------------------------------------------------------------|---------|------------------------------------------------------------------------------------------------------------|
| Do you prefer having on your property?                                                                                                   | closed  | yes / no                                                                                                   |
| Of you answer yes. Why?                                                                                                                  | open    | up to three responses                                                                                      |
| If you answered no. Why not?                                                                                                             | open    | up to three responses                                                                                      |
| In reference to trees on your property, do you see them as a benefit?                                                                    | closed  | yes / no                                                                                                   |
| Of you answer yes. Which (benefit)?                                                                                                      | open    | up to three responses                                                                                      |
| In reference to trees on your property, do you see them as a problem?                                                                    | closed  | yes / no                                                                                                   |
| Of you answer yes. Which (problem)?                                                                                                      | open    | up to three responses                                                                                      |
| In reference to trees on your property, do you see them as a benefit?                                                                    | closed  | yes / no                                                                                                   |
| Of you answer yes. Which (benefit)?                                                                                                      | open    | up to three responses                                                                                      |
| In reference to trees on your property, do you see them as a problem?                                                                    | closed  | yes / no                                                                                                   |
| Of you answer yes. Which (problem)?                                                                                                      | open    | up to three responses                                                                                      |
| What is your age?                                                                                                                        | closed  | age number                                                                                                 |
| In what type of residence do you live?                                                                                                   | closed  | owner / renter                                                                                             |
| What is your civil status?                                                                                                               | closed  | single / divorced / married or living with partner                                                         |
| Household size                                                                                                                           |         | number of residents in property                                                                            |
| Please, indicate your average annual income of your family (include the income of all members of the family living under the same roof). | closed  | incremental categories (\$0-\$9999, \$10000-\$19999, etc.)                                                 |
| What is your level of formal education?                                                                                                  | closed  | number of years for each education category (elementary school 6 years, intermediate school 9 years, etc.) |

**Tables S3.** Frequencies of responses of ecosystem services (Table S.3.1) and disservices (Table S.3.2)

**Table S3.1.** Frequencies of open-ended explanatory responses to preference for home trees (P), positive attitudes toward home (H) and neighborhood (N) trees. Each resident had up to three responses by question. Ecosystem services are classified by type according to the Millennium Ecosystem Assessment (2005).

| Ecosystem Services               | P   | H   | N   | Ecosystem Services       | P  | H   | N  |
|----------------------------------|-----|-----|-----|--------------------------|----|-----|----|
| <i>Regulation</i>                |     |     |     | <i>Cultural</i>          |    |     |    |
| shade                            | 138 | 165 | 130 | aesthetic value          | 80 | 62  | 97 |
| lower temperature                | 132 | 116 | 106 | spiritual                | 16 | 10  | 8  |
| air purification                 | 38  | 37  | 52  | recreation               | 6  | 2   | 0  |
| natural hazard moderation        | 10  | 6   | 9   | likes or prefers them    | 8  | 0   | 0  |
| erosion control                  | 5   | 4   | 4   | privacy                  | 2  | 5   | 3  |
| carbon sequestration             | 2   | 3   | 2   | relaxation               | 3  | 3   | 2  |
| noise reduction                  | 2   | 2   | 2   | family tradition         | 2  | 0   | 0  |
| pollution moderation             | 0   | 0   | 1   | improves economy         | 1  | 1   | 0  |
|                                  |     |     |     | tranquility              | 1  | 0   | 1  |
| <i>Support</i>                   |     |     |     | small trees              | 1  | 0   | 0  |
| oxygen production                | 78  | 68  | 79  | comfort                  | 1  | 0   | 0  |
| flora & fauna habitat            | 16  | 11  | 10  | liking to planting       | 1  | 0   | 0  |
| improves environment             | 13  | 0   | 5   | green                    | 0  | 1   | 0  |
| humidity                         | 1   | 1   | 0   | bird singing             | 0  | 0   | 1  |
| bird nesting                     | 1   | 0   | 0   | neighbor interaction     | 0  | 0   | 1  |
| help reforestation of the island | 1   | 0   | 0   | neighborhood well-being  | 0  | 0   | 1  |
| soil fertilization               | 1   | 0   | 0   |                          |    |     |    |
| soil drainage                    | 1   | 0   | 0   | <i>Provision</i>         |    |     |    |
| moisture in soil                 | 0   | 1   | 0   | food                     | 71 | 154 | 73 |
| ecological balance               | 0   | 1   | 0   | increased property value | 1  | 6   | 2  |
| clean environment                | 0   | 0   | 1   | medicine                 | 2  | 0   | 1  |
|                                  |     |     |     | brings rainwater         | 1  | 0   | 2  |
| <i>Well-being</i>                |     |     |     | economic value           | 1  | 1   | 0  |
| human well-being                 | 16  | 13  | 6   | saves electricity        | 1  | 0   | 0  |
| safety                           | 1   | 0   | 0   | improves economy         | 1  | 0   | 0  |

**Table S3.2.** Frequencies of open-ended explanatory responses to non-preference for home trees (P), negative attitudes toward home (H) and neighborhood (N) trees. Each resident had up to three responses for home or neighborhood trees. Ecosystem disservices are classified by type according to the Döhren & Haase (2015).

| Ecosystem Disservices                  | R  | H  | N  | Ecosystem Disservices                | R | H  | N  |
|----------------------------------------|----|----|----|--------------------------------------|---|----|----|
| <i>Economic impact</i>                 |    |    |    | <i>Ecological impact</i>             |   |    |    |
| maintenance hardship                   | 28 | 51 | 65 | induces pests                        | 0 | 17 | 13 |
| reduced structural integrity           | 12 | 46 | 27 | African tulip                        | 0 | 0  | 1  |
| power lines obstruction                | 0  | 16 | 26 | reduces sunlight for lower plants    | 0 | 0  | 1  |
| property damage due to natural hazards | 1  | 9  | 7  | termites                             | 0 | 1  | 0  |
| car damage due to fruit drops          | 0  | 1  | 0  |                                      |   |    |    |
| bird droppings                         | 0  | 0  | 1  | <i>Other</i>                         |   |    |    |
|                                        |    |    |    | does not like trees                  | 2 | 0  | 0  |
| <i>Health impact</i>                   |    |    |    | lack of space                        | 7 | 1  | 1  |
| cause asthma                           | 0  | 1  | 0  | not enough space                     | 1 | 0  | 0  |
| humid environment for children         | 0  | 1  | 0  | too big                              | 1 | 0  | 0  |
|                                        |    |    |    | nowhere to plant it                  | 1 | 0  | 0  |
| <i>Psychological impact</i>            |    |    |    | block sunlight needed to dry clothes | 0 | 0  | 1  |
| leads to neighbor disputes             | 1  | 8  | 9  | trees inappropriate for urban areas  | 1 | 0  | 0  |
| increased risk to personal injury      | 1  | 7  | 4  | disregard for unfruitful trees       | 1 | 0  | 0  |
| fruit theft                            | 1  | 1  | 0  | terrain not apt for planting         | 1 | 0  | 0  |
| lowers visibility                      | 0  | 2  | 3  | too few                              | 0 | 0  | 1  |
| facilitates criminal activity          | 0  | 0  | 5  | un-nested trees                      | 0 | 0  | 1  |
| public obstruction                     | 0  | 0  | 1  |                                      |   |    |    |
